# Supplementary material for: Bilateral Helicoid Peri-papillary Sub-retinal Fibrosis Due to a Biallelic NR2E3 Mutation: Describing Variable Expressivity of a Single Genetic Mutation
Source: Research Square preprint supplement (doi:10.21203/rs.3.rs-871644/v1), 2021-09-07
Supplement: Supplementary file 1 [file 6025cf6fcdda88527aded667.xlsx]

## Sheet: Sheet1
Table 2. Genotypic and phenotypic information of the two investigated families.
Family	Individual ID	Genotype of identified mutation	Clinical presentation
A	III-1	N/M	Normal
	III-2	N/M	Normal
	IV-1	M/M	High hyperopia, strabismus diagnosed in his infancy, bilateral helicoid peri-papillary sub-retinal fibrosis with diffuse retinal pigment epithelium changes.
	IV-2	N/M	Normal
B	IV-1	M/M	Normal visual acuity. No visual complaint. Suspected pallor in optic disc with slight arterial narrowing in both eyes without any pigment abnormality.
	IV-2	N/M	Normal
	V-1	M/M	Decreased vision in his teens without any refractive error. Multiple nummular pigmentary changes at subretinal level alongside the vascular arcuades, thinning in retinal arteries and CNV formation in his right eye. Schisis cavities in both eyes OCT.
	V-2	N/M	Normal
	IV-3	NA	Decreased vision and night blindness. Bilateral thinning in retinal arteries, decreased foveal reflex and nummular pigmentary changes at retinal pigment epithelium (RPE) level alongside the vascular arcuades.
	IV-4	NA	Decreased vision and night blindness. Bilateral thinning in retinal arteries, decreased foveal reflex and nummular pigmentary changes at retinal pigment epithelium (RPE) level alongside the vascular arcuades.
	V-3	NA	Decreased vision and night blindness. Bilateral thinning in retinal arteries, decreased foveal reflex and nummular pigmentary changes at retinal pigment epithelium (RPE) level alongside the vascular arcuades.
	V-4	NA	Decreased vision and night blindness. Bilateral thinning in retinal arteries, decreased foveal reflex and nummular pigmentary changes at retinal pigment epithelium (RPE) level alongside the vascular arcuades.
N, normal NR2E3 allele; M, mutated NR2E3 allele; NA, Not available, CNV: choroidal neovascularization, OCT: Optical coherence tomography.
